# Supplementary material
Source: PubMed Central journal article supplement (PMC5125548)
Supplement: NIHMS829870-supplement-SOM.pdf [file NIHMS829870-supplement-SOM.pdf]

**Table S1. List of sequences used in this study.**

| <b>Species</b>                 | <b>Identifier</b>                              | <b>Database</b>  |
|--------------------------------|------------------------------------------------|------------------|
| Angiosperm NRPE1 homologs      |                                                |                  |
| <i>Amborella trichopoda</i>    | evm_27.model.AmTr_v1.0_scaffold00131.41        | Amborella Genome |
| <i>Arabidopsis thaliana</i>    | AT2G40030                                      | TAIR             |
| <i>Aquilegia coerulea</i>      | Acoerulea.22047564<br>Acoerulea.22025488       | Phytozome 10     |
| <i>Citrus clementina</i>       | Cclementina.20791338                           | Phytozome 10     |
| <i>Citrus sinensis</i>         | Csinensis.18120100                             | Phytozome 10     |
| <i>Cucumis sativus</i>         | Csativus.16978203                              | Phytozome 10     |
| <i>Eucalyptus grandis</i>      | Egrandis.23599136                              | Phytozome 10     |
| <i>Fragaria vesca</i>          | Fvesca.27249047                                | Phytozome 10     |
| <i>Glycine max</i>             | Gmax.30498456<br>Gmax.30505760                 | Phytozome 10     |
| <i>Gossypium raimondii</i>     | Graimondii.26760711                            | Phytozome 10     |
| <i>Linum usitatissimum</i>     | Lusitatissimum.23162059                        | Phytozome 10     |
| <i>Medicago truncatula</i>     | Mtruncatula.31075688                           | Phytozome 10     |
| <i>Mimulus guttatus</i>        | Mguttatus.28945928                             | Phytozome 10     |
| <i>Oryza sativa</i>            | LOC_Os01g73430<br>LOC_Os02g05880               | Phytozome 10     |
| <i>Panicum virgatum</i>        | Pvirgatum.30305942<br>Pvirgatum.30252426       | Phytozome 10     |
| <i>Phaseolus vulgaris</i>      | Pvulgaris.27152868                             | Phytozome 10     |
| <i>Prunus persica</i>          | Ppersica.17669039                              | Phytozome 10     |
| <i>Populus trichocarpa</i>     | Ptrichocarpa.27003419<br>Ptrichocarpa.26998728 | Phytozome 10     |
| <i>Salix purpurea</i>          | Spurpurea.31444571                             | Phytozome 10     |
| <i>Setaria italica</i>         | Sitalica.19697436<br>Sitalica.19688672         | Phytozome 10     |
| <i>Solanum lycopersicum</i>    | Slycopersicum.27300428                         | Phytozome 10     |
| <i>Sorghum bicolor</i>         | Sbicolor.28384871                              | Phytozome 10     |
| <i>Theobroma cacao</i>         | Tcacao.27443915                                | Phytozome 10     |
| <i>Vitis vinifera</i>          | Vvinifera.17824747                             | Phytozome 10     |
| Oryza and related NRPE1a       |                                                |                  |
| <i>Brachypodium distachyon</i> | Bradi4g45065                                   | Phytozome        |
| <i>Leersia perrieri</i>        | LPERR02G03610                                  | EnsemblPlants    |
| <i>Oryza barthii</i>           | OBART02G04100                                  | EnsemblPlants    |

|                                  |                                         |               |
|----------------------------------|-----------------------------------------|---------------|
| <i>Oryza brachyantha</i>         | OB02G13460                              | EnsemblPlants |
| <i>Oryza glaberrima</i>          | ORGLA02G0038200                         | EnsemblPlants |
| <i>Oryza glumaepatula</i>        | OGLUM02G03900                           | EnsemblPlants |
| <i>Oryza longistaminata</i>      | OLONG_014977                            | EnsemblPlants |
| <i>Oryza meridionalis</i>        | OMERIO204920                            | EnsemblPlants |
| <i>Oryza nivara</i>              | ONIV02G04030                            | EnsemblPlants |
| <i>Oryza punctata</i>            | OPUNC02G03300                           | EnsemblPlants |
| <i>Oryza rufipogon</i>           | ORUFI02G04170                           | EnsemblPlants |
| <i>Oryza sativa ssp japonica</i> | LOC_Os02g05880                          | Phytozome     |
| <i>Oryza sativa ssp indica</i>   | BGIOGA007122                            | EnsemblPlants |
| <i>Triticum aestivum</i>         | genomic region near Traes_6AS_B5ED3BA5B | Phytozome     |

#### Brassicaceae and related NRPE1

---

|                                |                   |                              |
|--------------------------------|-------------------|------------------------------|
| <i>Aethionema arabicum</i>     | n.a. <sup>1</sup> | CoGe                         |
| <i>Arabidopsis arenosa</i>     | n.a. <sup>2</sup> | SRA PRJNA196706 <sup>3</sup> |
| <i>Arabidopsis halleri</i>     | Araha.54531s0001  | Phytozome 10                 |
| <i>Arabidopsis lyrata</i>      | 483042            | Phytozome 10                 |
| <i>Bochera strica</i>          | Bostr.23794s0061  | Phytozome 10                 |
| <i>Brassica oleraceae</i>      | Bo3g034650        | EnsemblPlants                |
| <i>Brassica rapa</i>           | Bra000162         | EnsemblPlants                |
| <i>Camelina sativa</i>         | n.a. <sup>1</sup> | CoGe                         |
| <i>Capsella grandiflora</i>    | Cagra.2495s0018   | CoGe                         |
| <i>Capsella rubella</i>        | Carubv10022497m   | Phytozome 10                 |
| <i>Eutrema salsugineum</i>     | Thhalv10016128m   | Phytozome 10                 |
| <i>Leavenworthia alabamica</i> | n.a. <sup>1</sup> | CoGe                         |
| <i>Neslia paniculata</i>       | n.a. <sup>1</sup> | CoGe                         |
| <i>Schrenkiella parvula</i>    | Tp4g22340         | CoGe                         |
| <i>Sisymbrium irio</i>         | n.a. <sup>1</sup> | CoGe                         |
| <i>Tarenaya hassleriana</i>    | Th2v22033         | CoGe                         |

#### Angiosperm SPT5L homologs

---

|                             |                                          |                  |
|-----------------------------|------------------------------------------|------------------|
| <i>Amborella trichopoda</i> | evm_27.model.AmTr_v1.0_scaffold00002.356 | Amborella Genome |
| <i>Arabidopsis lyrata</i>   | 487210                                   | Phytozome 11     |
| <i>Arabidopsis thaliana</i> | AT5G04290.1                              | TAIR             |
| <i>Aquilegia coerulea</i>   | Aquca_038_00139                          | Phytozome 11     |

|                                |                                                             |              |
|--------------------------------|-------------------------------------------------------------|--------------|
| <i>Boechera stricta</i>        | Bostr.2128s0018.1.p                                         | Phytozome 11 |
| <i>Brachypodium distachyon</i> | Bradi2g20517.2.                                             | Phytozome 11 |
| <i>Brassica rapa</i>           | Brara.J02756.1.p                                            | Phytozome 11 |
| <i>Capsella grandiflora</i>    | Cagra.9217s0009 Org_                                        | Phytozome 11 |
| <i>Capsella rubella</i>        | Carubv10000039m                                             | Phytozome 11 |
| <i>Citrus clementina</i>       | Ciclev10030480m.g                                           | Phytozome 11 |
| <i>Citrus sinensis</i>         | orange1.1g000247m                                           | Phytozome 11 |
| <i>Carica papaya</i>           | evm.model.supercontig_188.8<br>evm.model.supercontig_53.150 | Phytozome 11 |
| <i>Eucalyptus grandis</i>      | Eucgr.J01043.1                                              | Phytozome 11 |
| <i>Eutrema salsugineum</i>     | Thhalv10015730m                                             | Phytozome 11 |
| <i>Fragaria vesca</i>          | mrna23431.1-v1.0-hybrid                                     | Phytozome 11 |
| <i>Glycine max</i>             | Glyma.10G276900.1<br>Glyma.20G112800.1                      | Phytozome 11 |
| <i>Gossypium raimondii</i>     | Gorai.011G234600.1                                          | Phytozome 11 |
| <i>Kalanchoe marnieriana</i>   | Kalax.0009s0224.1.p                                         | Phytozome 11 |
| <i>Linum usitatissimum</i>     | Lus10037946<br>Lus10038680                                  | Phytozome 11 |
| <i>Manihot esculenta</i>       | Manes.07G094600.1.p                                         | Phytozome 11 |
| <i>Malus domestica</i>         | MDP0000201216<br>MDP0000232228                              | Phytozome 11 |
| <i>Medicago truncatula</i>     | Medtr1g111560.1                                             | Phytozome 11 |
| <i>Mimulus guttatus</i>        | Migut.F01946.1.p                                            | Phytozome 11 |
| <i>Oryza sativa</i>            | LOC_Os05g43060.1                                            | Phytozome 11 |
| <i>Panicum hallii</i>          | Pahal.C02415.1                                              | Phytozome 11 |
| <i>Panicum virgatum</i>        | Pavir.Ca01318.1.p<br>Pavir.Cb01635.1.p                      | Phytozome 11 |
| <i>Phaseolus vulgaris</i>      | Phvul.007G024600.1                                          | Phytozome 11 |
| <i>Populus trichocarpa</i>     | Potri.008G032800.1<br>Potri.010G228800.1                    | Phytozome 11 |
| <i>Ricinus communis</i>        | 29898.t000002                                               | Phytozome 11 |
| <i>Salix purpurea</i>          | SapurV1A.0411s0080.1.p                                      | Phytozome 11 |
| <i>Theobroma cacao</i>         | Thecc1EG043328t1                                            | Phytozome 11 |
| <i>Zea mays</i>                | GRMZM2G370715_P01<br>GRMZM2G375222_P01                      | Phytozome 11 |

<sup>1</sup> Orthologs identified by similarity in unannotated genome. See methods for details.

<sup>2</sup> Short reads mapped to *Ar. lyrata* genomes for ortholog and SNP identification.

<sup>3</sup> from Hollister, *et al.* (2012). Genetic adaptation associated with genome-doubling in autotetraploid *Arabidopsis arenosa*. *PLoS Genetics*, 8(12), e1003093.

**Table S2: McDonald-Kreitman test of adaptive evolution.**

|                                                    | Polymorphic |         | Fixed  |         | p-value |
|----------------------------------------------------|-------------|---------|--------|---------|---------|
|                                                    | Synon.      | Nonsyn. | Synon. | Nonsyn. |         |
| <b><i>Ar. thaliana</i> – <i>Ar. lyrata</i></b>     |             |         |        |         |         |
| Catalytic                                          | 58          | 59      | 71     | 51      | n.s.    |
| Ago platform                                       | 26          | 77      | 18     | 44      | n.s.    |
| <b><i>Ar. thaliana</i> – <i>Ar. arenosa</i></b>    |             |         |        |         |         |
| Catalytic                                          | 58          | 59      | 75     | 51      | n.s.    |
| Ago platform                                       | 26          | 77      | 24     | 48      | n.s.    |
| <b><i>Ar. thaliana</i> – <i>Bo. stricta</i></b>    |             |         |        |         |         |
| Catalytic                                          | 58          | 61      | 93     | 63      | n.s.    |
| Ago platform                                       | 26          | 80      | 39     | 59      | n.s.    |
| <b><i>Ar. thaliana</i> – <i>Cap. rubella</i></b>   |             |         |        |         |         |
| Catalytic                                          | 58          | 61      | 128    | 69      | 0.0481  |
| Ago platform                                       | 26          | 77      | 42     | 64      | n.s.    |
| <b><i>Ar. thaliana</i> – <i>Ne. paniculata</i></b> |             |         |        |         |         |
| Catalytic                                          | 59          | 59      | 104    | 65      | n.s.    |
| Ago platform                                       | 26          | 76      | 32     | 56      | n.s.    |

n.s., not significant (FDR-adjusted  $p < 0.05$ )

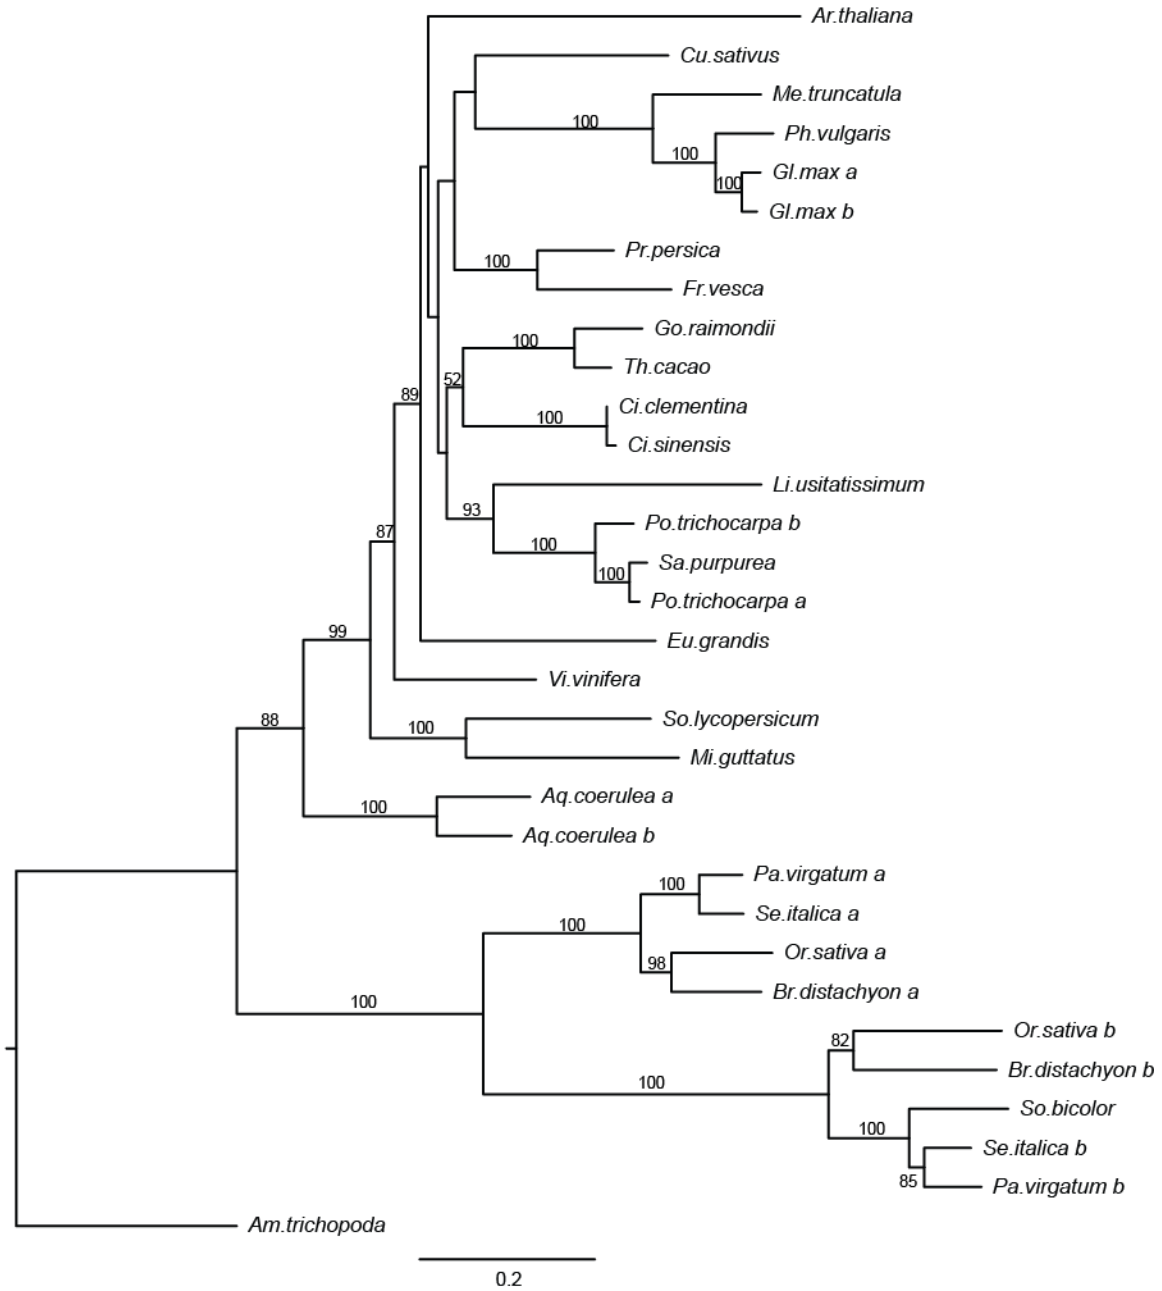

**Figure S1. Phylogenetic relationship between NRPE1 orthologs analyzed in Figure 1.** A maximum-likelihood tree generated from nucleotide sequence of catalytic domains A-H of 32 angiosperm NRPE1 orthologs. Positions in the alignment with a gap in >20% of taxa were removed. Branches list bootstrap support from 100 replicates when  $\geq 50$ . The gene tree conforms to accepted organismal phylogeny.

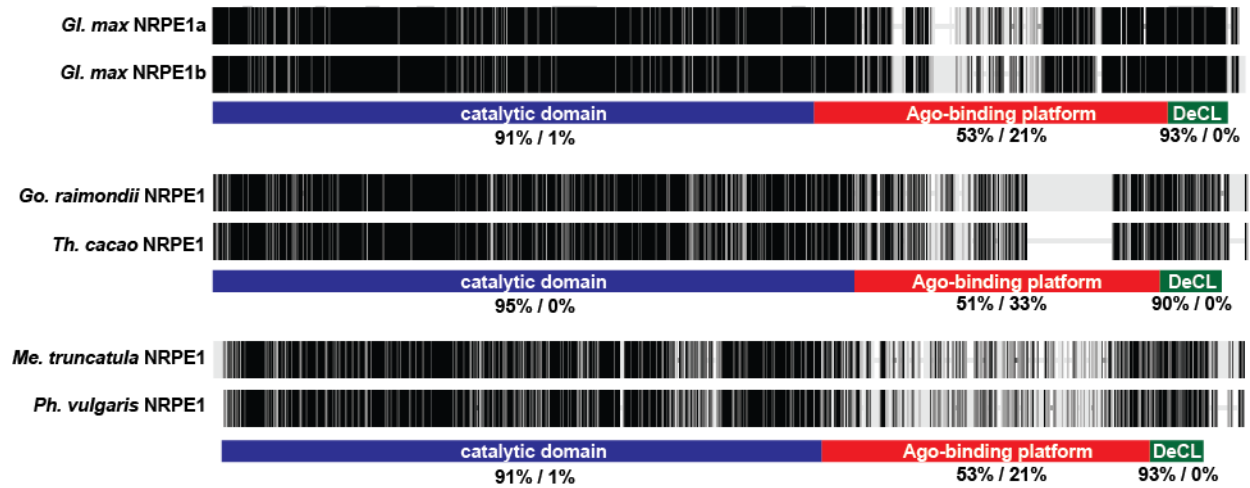

**Figure S2. Pairwise comparison of NRPE1 orthologs.** Amino acid sequences were aligned with MUSCLE. Identical positions are black and mismatches and gaps are gray. Values below the domain schematics are % positives / % gaps as measured with BLASTP.

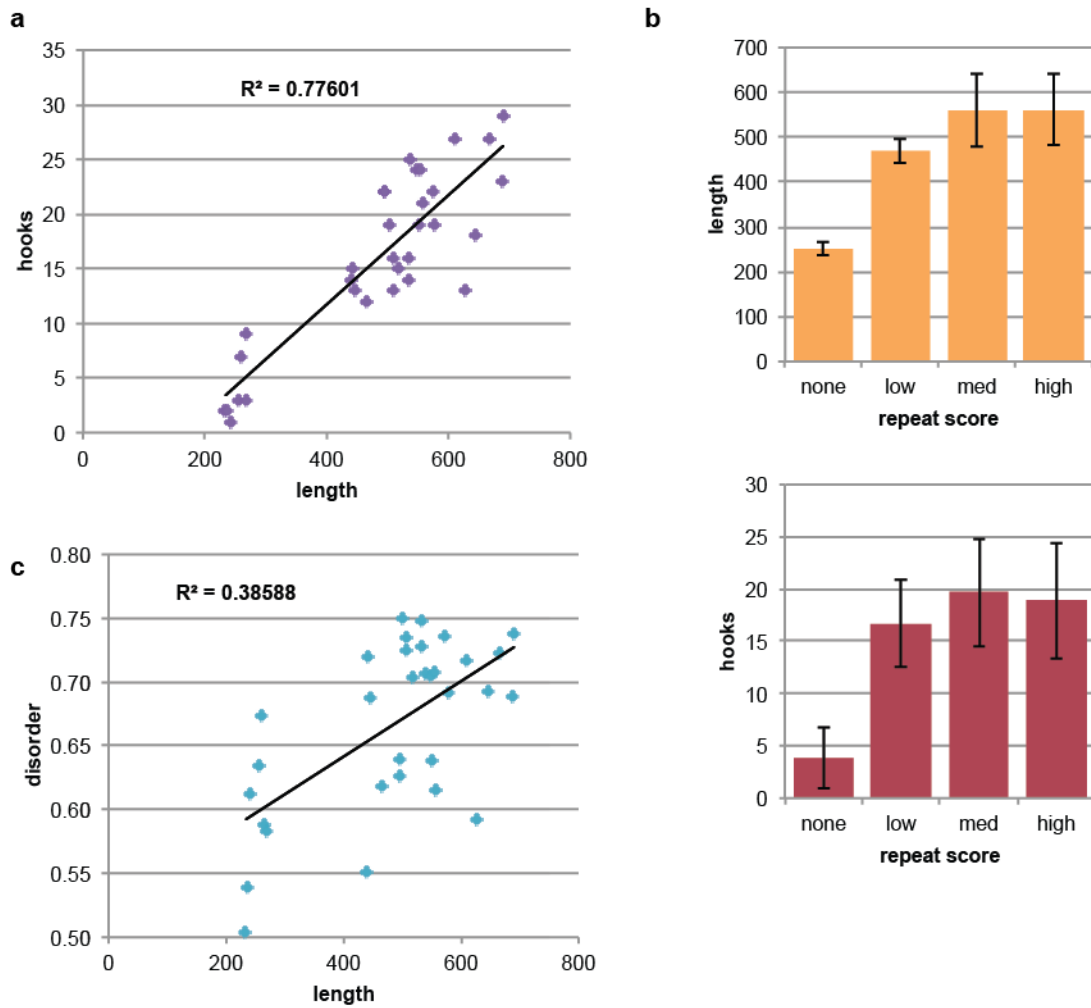

**Figure S3. Conserved features of Ago-binding platforms are correlated.** (a) Longer Ago-binding platforms have more Ago hooks. (b) Ago-binding platforms with higher repeat scores are longer (top) and have more Ago hooks (bottom). Error bars represent standard deviation of values in each group. Repeat score as listed in Table 1. (c) Longer Ago-binding platforms also have greater average disorder scores. Trend lines and  $R^2$  values from a linear regression.

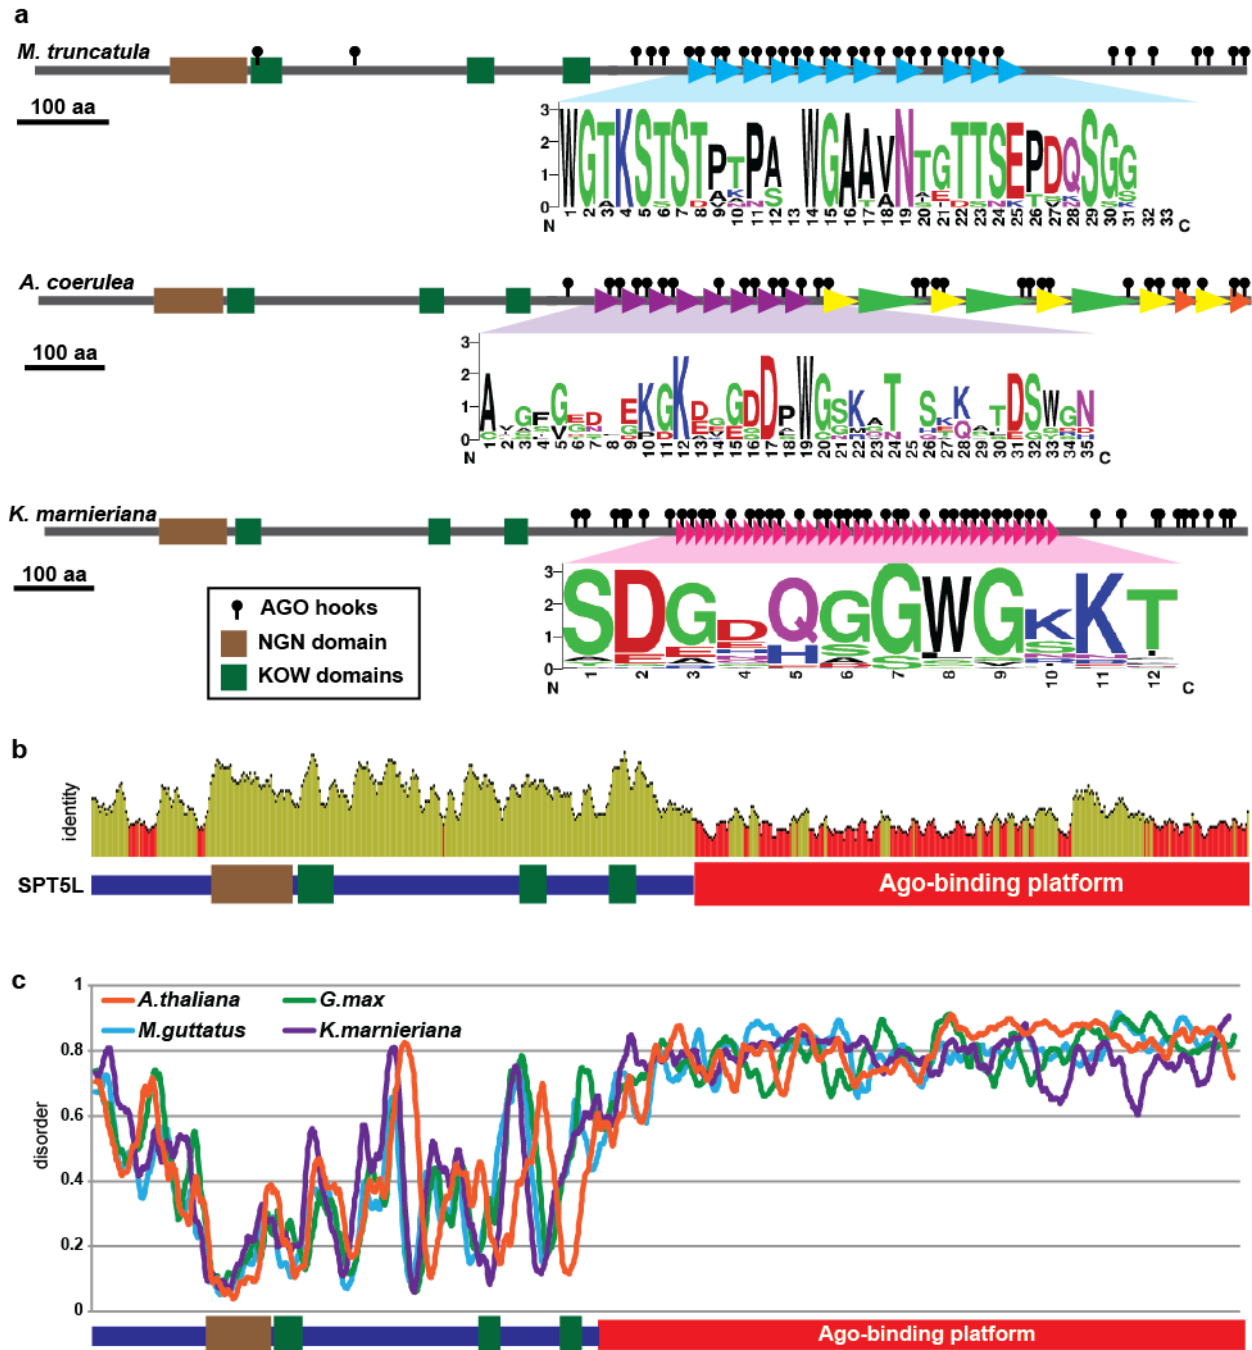

**Figure S4. The Ago-binding platform of SPT5L is repetitive, non-conserved, and intrinsically disordered.** (a) Representative SPT5L orthologs from across angiosperms demonstrate variation in the number, sequence, and conservation of tandem repeats in the Ago-binding platforms (colored triangles). (b) Identity between SPT5L orthologs from angiosperms is lowest in the C-terminal Ago-binding platform. After MUSCLE alignment columns with >20% gaps were stripped; a 10-amino acid sliding window of identity is displayed (above). The SPT5L domain structure is displayed below. (c) The Ago-binding platform is intrinsically disordered. IUPred disorder prediction for four SPT5L orthologs (*Arabidopsis thaliana*, *Glycine max*, *Mimulus guttatus*, *Kalanchoe marnieriana*); a 10-amino acid rolling average is plotted.



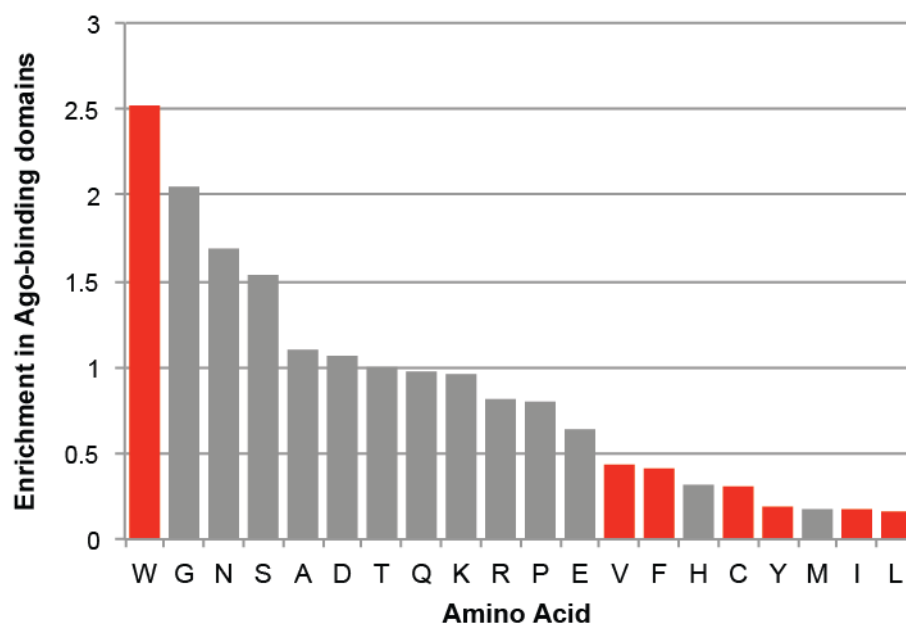

**Figure S5. Depletion of order-promoting amino acids in Ago-binding platforms.** Amino acids were arrayed by enrichment in Ago-binding platforms relative to other protein regions. Order-promoting amino acids are marked in red. Enrichment data from (Karlowski et al., 2010); order-promoting data from (Radivojac et al., 2007).

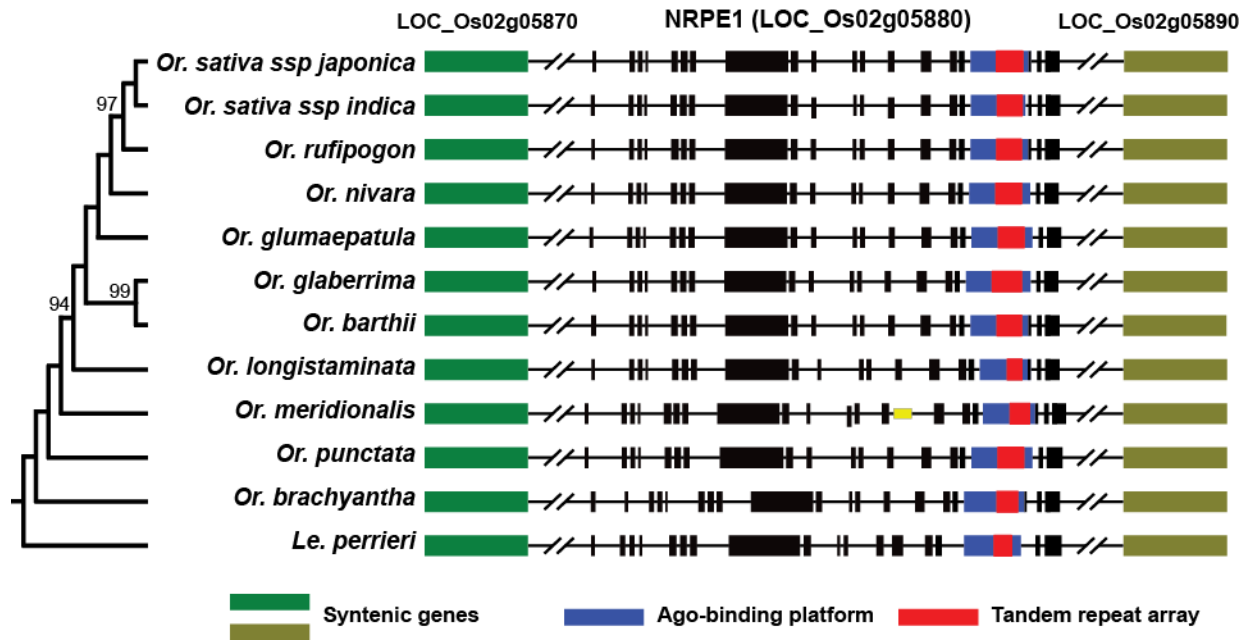

**Figure S6. NRPE1a orthologs in the genus *Oryza*.** Phylogenetic relationships between homologs are depicted on the left, based on a ML gene tree of the NRPE1a catalytic region. This gene tree recapitulates the expected species tree. Syntenic flanking genes are colored green and gold, with the *Or. sativa* gene identifier listed above. Boxes represent exons and lines represent introns. The Ago-binding platform is in blue, and the tandem repeats are in red. The small yellow box depicts missing sequence.

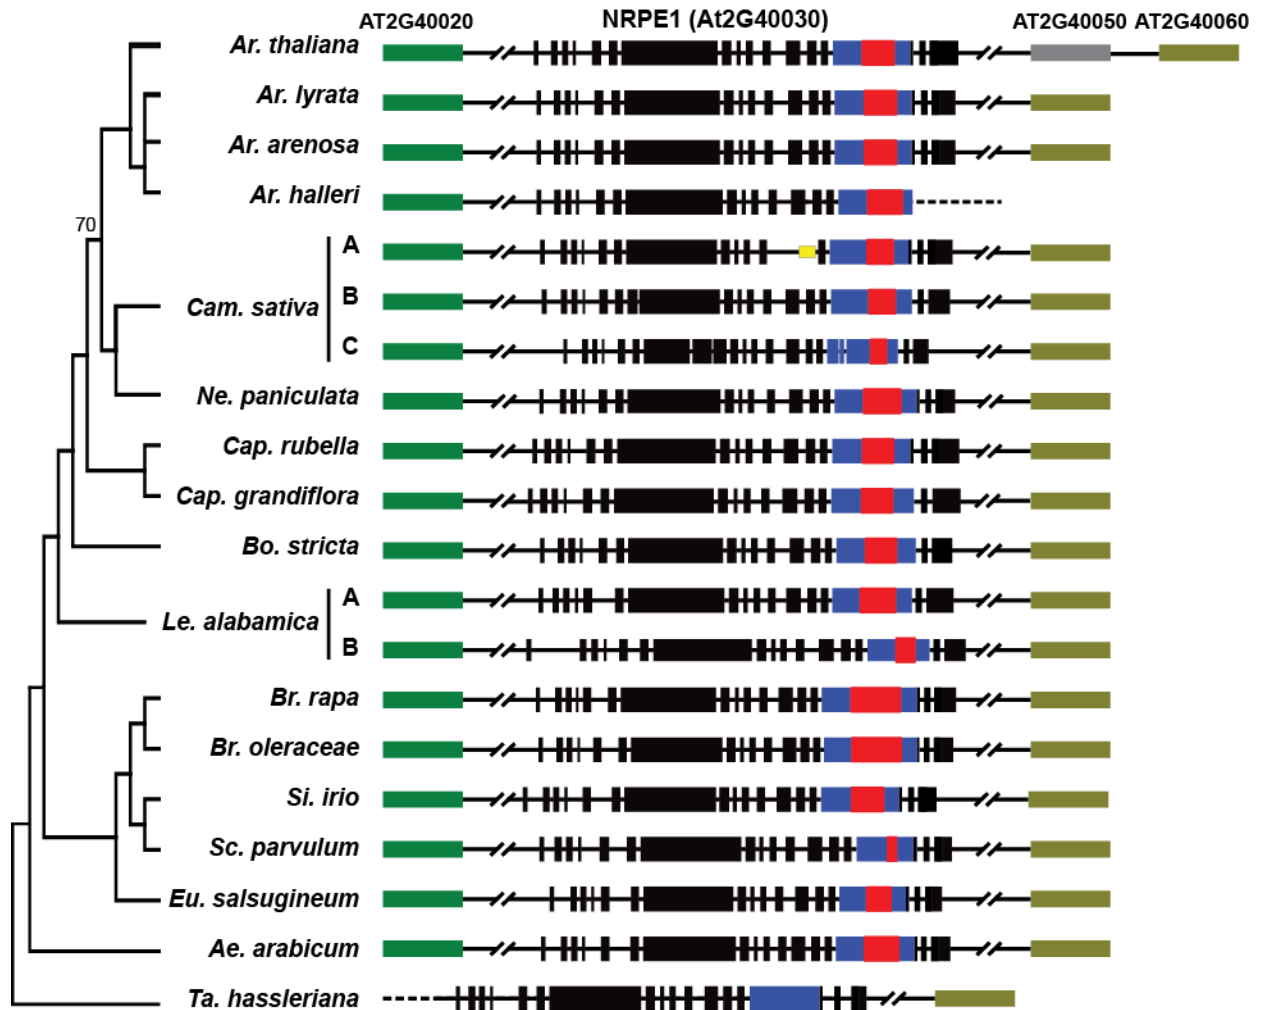

**Figure S7. NRPE1 orthologs in the family Brassicaceae.** Phylogenetic relationships between homologs are depicted on the left, based on a ML gene tree of the NRPE1 catalytic region. This gene tree recapitulates the expected species tree and includes recent polyploidization events in *Camelina sativa* and *Leavenworthia alabamica*. All features are colored as in Figure S7. The *T. hassleriana* sequence is at the end of a contig and does not have a left flanking gene.

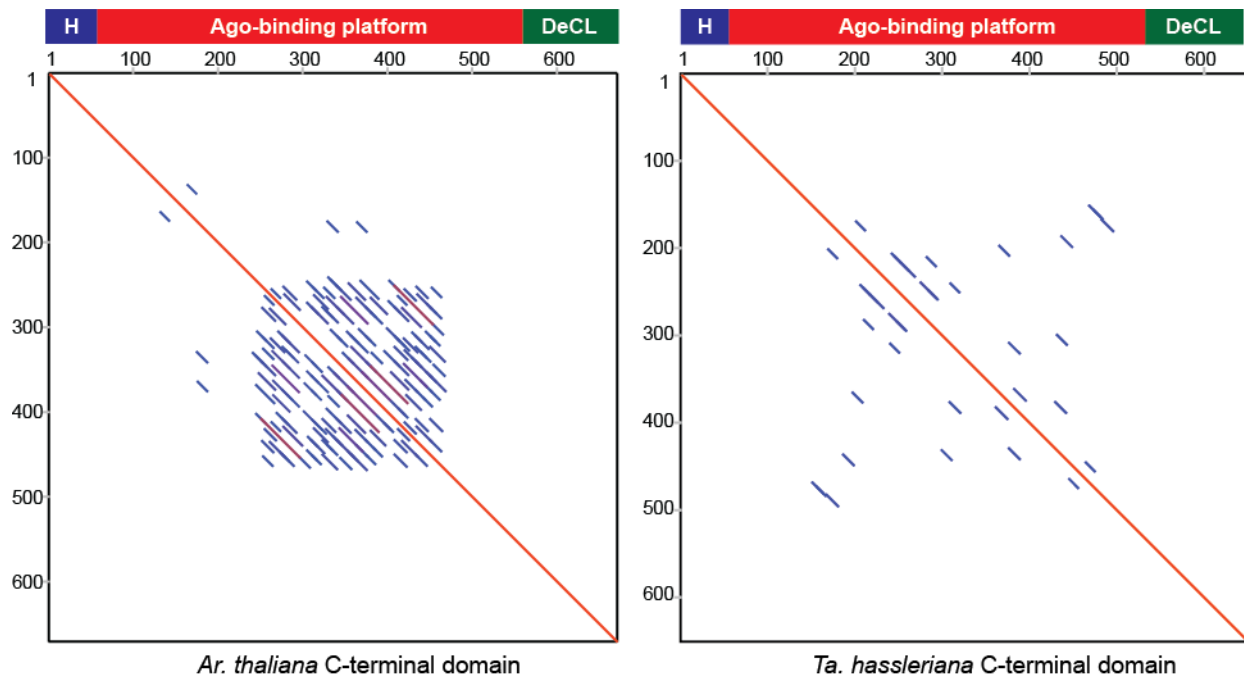

**Figure S8. The *Ta. hassleriana* Ago-binding platform contains repetitive character.** Self-alignment analysis (dot plots) demonstrates strong and weak repetitive character in *Ar. thaliana* (left) and *Ta. hassleriana* (right) carboxy terminal domains, respectively.

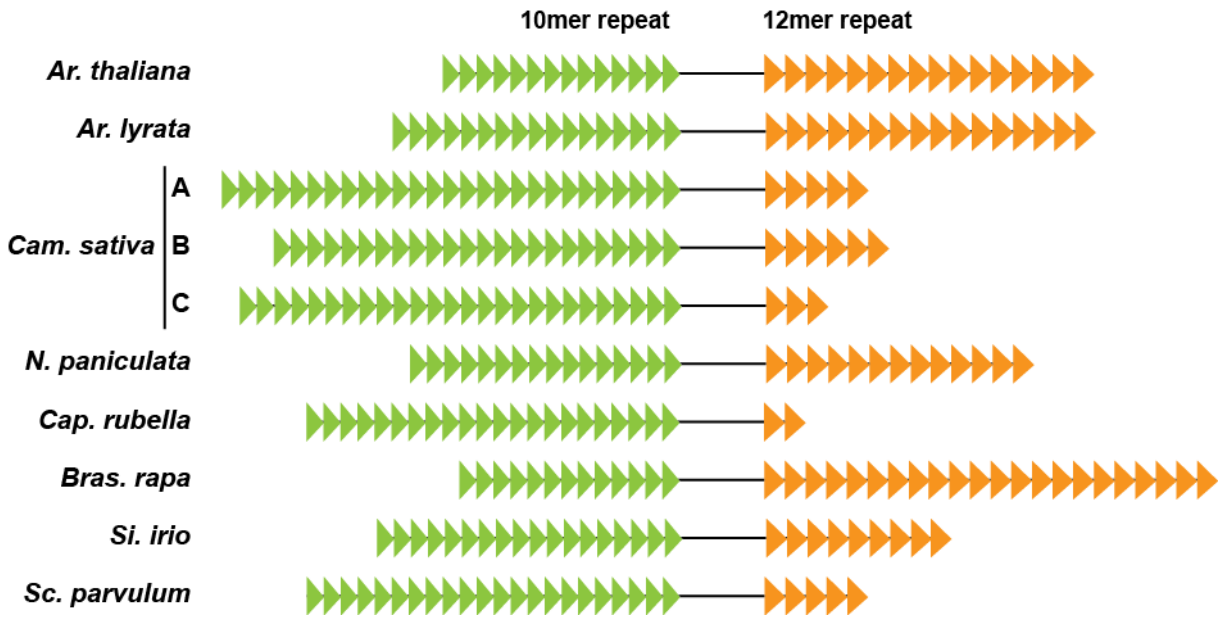

**Figure S9. Variation in tandem repeats in the SPT5L Ago-binding platform.** Diagram of tandem repeats from various Brassicaceae species, including three homeologs in *Camelina sativa* (A-C). All species have two distinct tandem repeat arrays found on separate exons and the sequence between the arrays is similar.

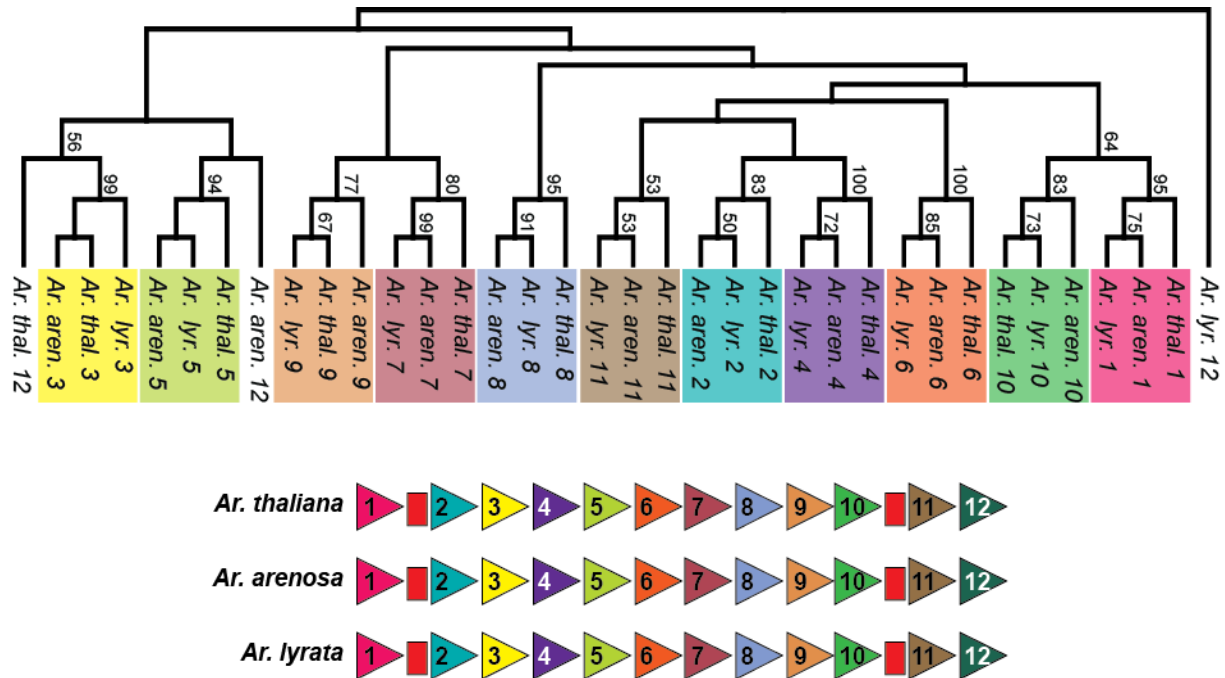

**Figure S10. Phylogenetic analysis of repeats in the *Arabidopsis* genus demonstrates no changes in the NRPE1 repeat platform.** (top) Cladogram based on ML tree of nucleotide sequence from individual repeats in *Ar. thaliana*, *Ar. arenosa*, and *Ar. lyrata* NRPE1 orthologs. Bootstrap values from 100 replicates are reported when  $\geq 50$ . (bottom) Diagram of tandem repeats in these species colored by phylogenetic relationships.

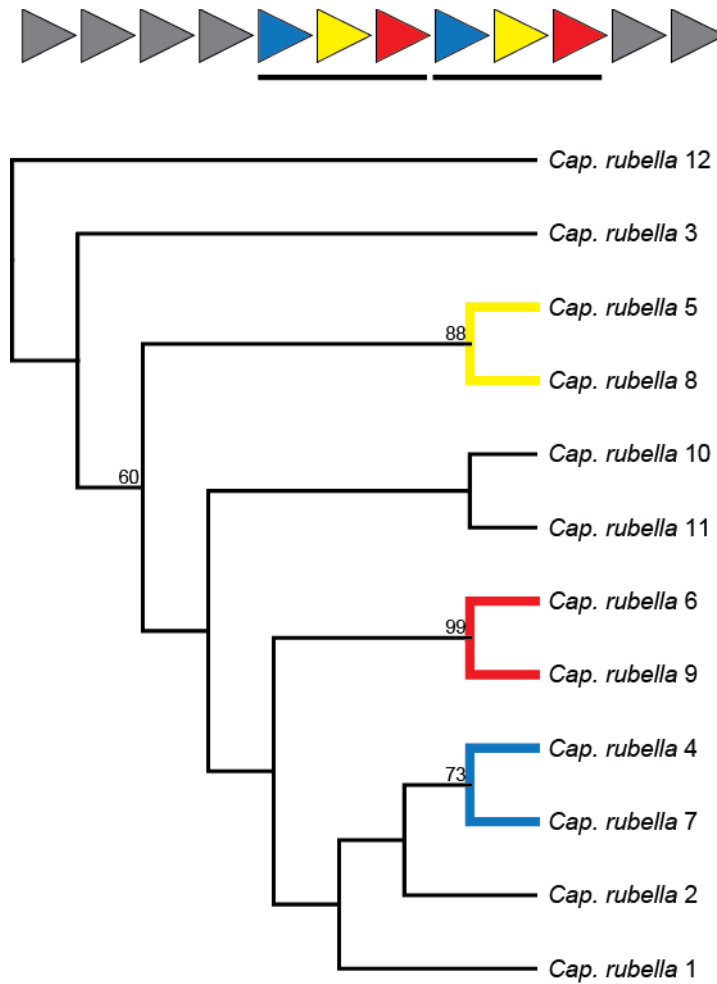

**Figure S11. Phylogenetic analysis of *Capsella rubella* repeats supports a three-unit duplication.** (top) Diagram of *Cap. rubella* tandem repeats colored by phylogenetic relationships. (bottom) Cladogram based on ML tree of individual repeats using nucleotide sequence. Bootstrap values from 100 replicates are reported when  $\geq 50$ .

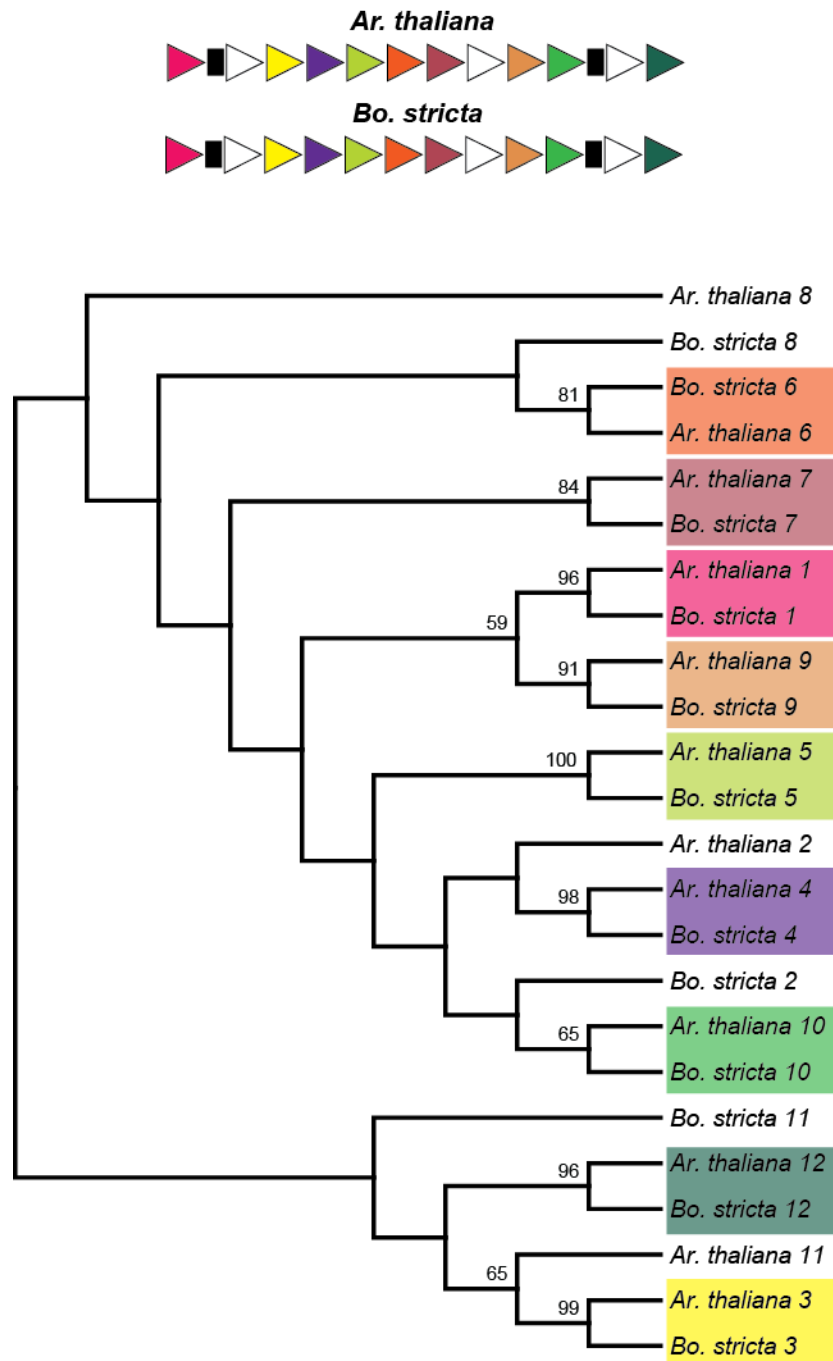

**Figure S12. Phylogenetic analysis of *Boechera stricta* repeats demonstrates the ancestral repeat state.** (top) Diagram of *Ar. thaliana* and *Bo. stricta* tandem repeat array showing identical placement of degenerate repeats. (bottom) Cladogram based on ML tree of individual *Ar. thaliana* and *Bo. stricta* repeat units shows colinearity of repeats. Bootstrap values from 100 replicates are reported when  $\geq 50$ .



## SUPPORTING INFORMATION NOTES

Note S1. CDS sequences from angiosperm NRPE1 sequences listed in Table S1.

Note S2. CDS sequences from angiosperm SPT5L sequences listed in Table S1.

Note S3. CDS sequences from *Orzya* NRPE1 sequences listed in Table S1.

Note S4. CDS sequences from Brassicaceae NRPE1 sequences listed in Table S1.

All SI notes are .fasta files and can be opened with any text editor or DNA analysis software.

## REFERENCES

**Karlowski WM, Zielesinski A, Carrère J, Pontier D, Lagrange T, Cooke R. 2010.** Genome-wide computational identification of WG/GW Argonaute-binding proteins in Arabidopsis. *Nucleic acids research* **38**: 4231–4245.

**Radivojac P, Iakoucheva LM, Oldfield CJ, Obradovic Z, Uversky VN, Dunker AK. 2007.** Intrinsic disorder and functional proteomics. *Biophysical Journal* **92**: 1439–1456.
